# Supplementary material
Source: Royal Society of Chemistry journal article supplement (doi:10.1039/d6cp00266h)
Supplement: d6cp00266h1.pdf [file d6cp00266h1.pdf]

## Supporting Information

### Cobalt-Free High-Energy Ternary Cathode

### $\text{LiNi}_{0.9}\text{Fe}_{0.05}\text{Mn}_{0.05}\text{O}_2$ : Synthesis and Electrochemical Performance for High-Energy Lithium-Ion Batteries

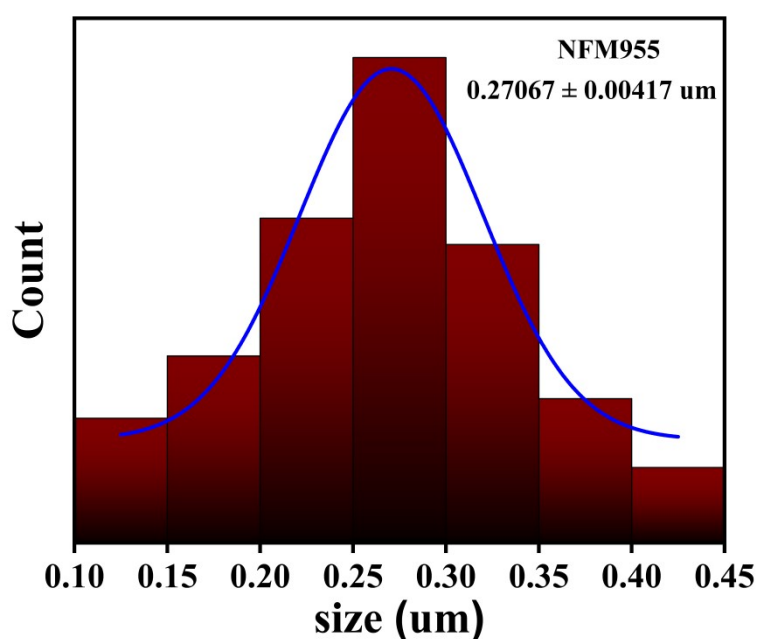

Figure S1 Particle size distribution diagram of NFM955 cathode material synthesized under calcination condition of 750°C for 20 h

Table S1. Rietveld refinement data of NFM955 samples.

| sample          | NFM 725°C | NFM 775°C | NFM 750°C | NFM 750°C | NFM 750°C |
|-----------------|-----------|-----------|-----------|-----------|-----------|
|                 | 20 h      | 20 h      | 20 h      | 16 h      | 24 h      |
| $a(\text{Å})$   | 2.87987   | 2.87800   | 2.88657   | 2.87248   | 2.88105   |
| $c(\text{Å})$   | 14.22269  | 14.21997  | 14.26459  | 14.18892  | 14.22865  |
| $V(\text{Å}^3)$ | 102.155   | 102.002   | 102.933   | 101.390   | 102.281   |
| $c/a$           | 4.93865   | 4.94092   | 4.94171   | 4.93960   | 4.93870   |
| Ni in Li site   | 5.66%     | 8.80%     | 4.52%     | 7.89%     | 8.12%     |

Table S2. First charge-discharge data of NFM955 samples at 0.1C

| sample         | Initial Charge Specific Capacity (mAh/g) | Initial Discharge Specific Capacity (mAh/g) | Coulombic Efficiency (%) |
|----------------|------------------------------------------|---------------------------------------------|--------------------------|
| NFM 725°C 20 h | 225.86                                   | 194.35                                      | 86.05                    |
| NFM 775°C 20 h | 218.59                                   | 189.28                                      | 86.59                    |
| NFM 750°C 20 h | 226.73                                   | 197.85                                      | 87.26                    |
| NFM 750°C 16 h | 229.35                                   | 192.59                                      | 83.97                    |
| NFM 750°C 24 h | 219.82                                   | 185.60                                      | 84.43                    |

Table S3. The electrochemical performance data of NFM955 cathode materials at 0.2 C

| sample         | Initial Discharge<br>Specific Capacity<br>(mAh/g) | 100th discharge<br>specific capacity<br>(mAh/g) | Capacity Retention<br>Rate<br>(%) |
|----------------|---------------------------------------------------|-------------------------------------------------|-----------------------------------|
| NFM 725°C 20 h | 181.90                                            | 150.92                                          | 82.97                             |
| NFM 775°C 20 h | 179.45                                            | 145.49                                          | 81.08                             |
| NFM 750°C 20 h | 194.89                                            | 168.17                                          | 86.29                             |
| NFM 750°C 16 h | 180.65                                            | 152.80                                          | 84.58                             |
| NFM 750°C 24 h | 179.82                                            | 149.00                                          | 82.86                             |

Table S4. The electrochemical performance data of NFM955 cathode materials at 0.5 C

| sample         | Initial Discharge Specific Capacity (mAh/g) | 100th discharge specific capacity (mAh/g) | Capacity Retention Rate (%) |
|----------------|---------------------------------------------|-------------------------------------------|-----------------------------|
| NFM 725°C 20 h | 163.69                                      | 151.77                                    | 92.72                       |
| NFM 775°C 20 h | 162.99                                      | 143.06                                    | 87.77                       |
| NFM 750°C 20 h | 167.60                                      | 155.45                                    | 92.75                       |
| NFM 750°C 16 h | 162.44                                      | 143.39                                    | 88.27                       |
| NFM 750°C 24 h | 159.64                                      | 145.11                                    | 90.89                       |

Table S5. The rate performance data of NFM955 samples

| sample         | 0.1 C  | 0.2 C  | 0.5 C  | 1 C    | 2 C    | 5 C   | 0.1 C  | Retention Rate |
|----------------|--------|--------|--------|--------|--------|-------|--------|----------------|
| NFM 725°C 20 h | 194.35 | 178.37 | 157.00 | 134.23 | 118.68 | 86.96 | 175.40 | 90.24%         |
| NFM 775°C 20 h | 189.28 | 178.56 | 163.63 | 143.77 | 117.95 | 80.49 | 181.53 | 95.90%         |
| NFM 750°C 20 h | 197.85 | 189.78 | 164.42 | 144.52 | 131.1  | 92.87 | 184.49 | 93.24%         |
| NFM 750°C 16 h | 192.59 | 178.7  | 159.9  | 137.91 | 120.54 | 90.57 | 175.49 | 91.12%         |
| NFM 750°C 24 h | 185.60 | 177.03 | 161.03 | 143.94 | 130.70 | 99.61 | 176.87 | 95.29%         |

Table S6. EIS fitting parameters of NFM955 cathode materials after the first cycle.

| sample         | $R_s(\Omega)$ | $R_f(\Omega)$ | $R_{ct}(\Omega)$ | $DLi+(\text{cm}^2\text{s}^{-1})$ |
|----------------|---------------|---------------|------------------|----------------------------------|
| NFM 725°C 20 h | 1.687         | 19.95         | 37.37            | $2.2517 \times 10^{-14}$         |
| NFM 775°C 20 h | 1.841         | 23.19         | 17.12            | $6.9921 \times 10^{-14}$         |
| NFM 750°C 20 h | 2.139         | 18.69         | 16.12            | $8.1051 \times 10^{-14}$         |
| NFM 750°C 16 h | 2.556         | 25.05         | 66.96            | $5.0831 \times 10^{-14}$         |
| NFM 750°C 24 h | 3.139         | 32.89         | 64.85            | $1.5136 \times 10^{-14}$         |

TableS7 Compared with the previous circulating properties of related cathode materials.

| sample                                                                    | Synthetic methods                                             | Initial discharge capacity(mAh/g)                              | Capacity retention(%)        | Potential Range (V vS Li <sup>+</sup> /Li) | Refs      |
|---------------------------------------------------------------------------|---------------------------------------------------------------|----------------------------------------------------------------|------------------------------|--------------------------------------------|-----------|
| LiNi <sub>0.8</sub> Mn <sub>0.1</sub> Fe <sub>0.1</sub> O <sub>2</sub>    | Co-precipitation+ solid-state                                 | 79 @ C/2, 125 @ C/10                                           | 51% after 70 cycles @ C/5    | 3.0 ~ 4.4                                  | [33]      |
| LiNi <sub>0.8</sub> Fe <sub>0.15</sub> Al <sub>0.05</sub> O <sub>2</sub>  | Co-precipitation                                              | 180 @ C/3, 190 @ C/10                                          | 70% after 100 cycles @C/3    | 3.0 ~ 4.5                                  | [9]       |
| LiNi <sub>0.9</sub> Fe <sub>0.05</sub> Al <sub>0.05</sub> O <sub>2</sub>  | Modified rheological phase reaction                           | 195 @ C/10                                                     | 85% after 100 cycles @1 C    | 3.0 ~ 4.5                                  | [34]      |
| LiNi <sub>0.8</sub> Fe <sub>0.1</sub> Al <sub>0.1</sub> O <sub>2</sub>    | Solid-state                                                   | 160 @ C/5, 180 @ C/10                                          | 99.6% after 100 cycles @C/2  | 3.0 ~ 4.5                                  | [34]      |
| LiNi <sub>0.95</sub> Mg <sub>0.02</sub> Al <sub>0.03</sub> O <sub>2</sub> | Co-precipitation                                              | 176.6 @ C/10, 140.7 @ 1 C, 108.1 @ C/2, 88.4 @ 2 C, 59.1 @ 5 C | 67.1% after 100 cycles @C/2  | 2.3 ~ 4.8                                  | [35]      |
| LiNi <sub>0.9</sub> Fe <sub>0.05</sub> Mn <sub>0.05</sub> O <sub>2</sub>  | homogeneous co-precipitation and high-temperature solid-state | 197.85 @ C/10, 194.89 @ C/5, 167.60 @ C/2                      | 92.75% after 100 cycles @C/2 | 2.5 ~ 4.3                                  | This work |
